# Supplementary material for: National Institutes of Health research project grant inflation 1998 to 2021
Source: eLife. 2023 Feb 10;12:e84245. doi: 10.7554/eLife.84245 (PMC9984192; doi:10.7554/eLife.84245)
Supplement: Source data 1. [file elife-84245-data1.xlsx]

## Sheet: BRDPI_change_index_2021
FY	Annual_change
1950
1951	0.0644383
1952	0.0301068
1953	0.0188561
1954	0.0114127
1955	0.0143336
1956	0.0276609
1957	0.0368637
1958	0.0242664
1959	0.0195592
1960	0.0208052
1961	0.0214399
1962	0.0228038
1963	0.0273626
1964	0.0217016
1965	0.02993
1966	0.0360909
1967	0.0438815
1968	0.047454
1969	0.0535788
1970	0.062635
1971	0.0580192
1972	0.049773
1973	0.0477458
1974	0.063671
1975	0.106882
1976	0.0745786
1977	0.0796938
1978	0.0740439
1979	0.0830838
1980	0.098
1981	0.104
1982	0.086
1983	0.062
1984	0.059
1985	0.056
1986	0.0419851
1987	0.0532952
1988	0.0501322
1989	0.0519612
1990	0.0542898
1991	0.0482567
1992	0.0441092
1993	0.0341689
1994	0.03871
1995	0.0346391
1996	0.0255888
1997	0.0278173
1998	0.0339056
1999	0.0316611
2000	0.0372652
2001	0.0332471
2002	0.0331222
2003	0.0351509
2004	0.0372562
2005	0.0389045
2006	0.0462945
2007	0.0379408
2008	0.0468092
2009	0.0292755
2010	0.03041
2011	0.02861
2012	0.01281
2013	0.01873
2014	0.02149
2015	0.02034
2016	0.02174
2017	0.026
2018	0.0249472
2019	0.02115
2020	0.01746
2021	0.02142
2022	0.03085
2023	0.02555
2024	0.02297
