# Supplementary material for: National Institutes of Health research project grant inflation 1998 to 2021
Source: eLife. 2023 Feb 10;12:e84245. doi: 10.7554/eLife.84245 (PMC9984192; doi:10.7554/eLife.84245)
Supplement: Source data 2. [file elife-84245-data2.xlsx]

## Sheet: GDPPI_change_index_2021
FY	Annual_change
1950
1951	0.0539064
1952	0.0400635
1953	0.0181251
1954	0.0117405
1955	0.00762715
1956	0.0258009
1957	0.0372949
1958	0.0302213
1959	0.015322
1960	0.0138473
1961	0.0133705
1962	0.0102205
1963	0.01204
1964	0.0123791
1965	0.0173093
1966	0.0217262
1967	0.0302921
1968	0.0346589
1969	0.0457193
1970	0.053551
1971	0.0507108
1972	0.0474754
1973	0.0434325
1974	0.0713138
1975	0.103421
1976	0.0693963
1977	0.0723794
1978	0.0673422
1979	0.0807866
1980	0.0872268
1981	0.0980479
1982	0.0695346
1983	0.0437294
1984	0.035775
1985	0.0334039
1986	0.0224958
1987	0.0223576
1988	0.0324011
1989	0.0403798
1990	0.0366253
1991	0.0356922
1992	0.024984
1993	0.0234933
1994	0.0218078
1995	0.0212495
1996	0.0187993
1997	0.0177726
1998	0.0124962
1999	0.0124452
2000	0.0208228
2001	0.0242249
2002	0.0157197
2003	0.0191549
2004	0.0244203
2005	0.0304277
2006	0.0325077
2007	0.0274668
2008	0.0208212
2009	0.0101823
2010	0.00867885
2011	0.0201947
2012	0.0183006
2013	0.0183361
2014	0.0193483
2015	0.0114308
2016	0.00827394
2017	0.017815
2018	0.0233057
2019	0.0195682
2020	0.0132735
2021	0.0307635
2022	0.0533003
2023	0.0325522
2024	0.0212463
